# Supplementary material for: Transdiagnostic impairments in white matter integrity across the Psychosis Continuum: a systematic review and meta-analysis of diffusion studies
Source: Research Square preprint supplement (doi:10.21203/rs.3.rs-6232144/v1), 2025-05-05
Supplement: Supplementary file 1 [file c139576d1e7d5dc5698f6358.pdf]

| Supplementary Table 1. CoCoPop (Condition, Context and Population) criteria |                                                                                                                                                                                   |                                                                                                                                                                                                                                                                          |
|-----------------------------------------------------------------------------|-----------------------------------------------------------------------------------------------------------------------------------------------------------------------------------|--------------------------------------------------------------------------------------------------------------------------------------------------------------------------------------------------------------------------------------------------------------------------|
| Parameter                                                                   | Inclusion criteria                                                                                                                                                                | Exclusion criteria                                                                                                                                                                                                                                                       |
| Condition                                                                   | At least some adult patients with a diagnosis of PSD disorders (e.g. bipolar disorder (BD), schizophrenia (SCZ), or schizoaffective disorder (SAD)), as assessed by the DSM, ICD. | <ul style="list-style-type: none"> <li>- Absence of DSM or ICD diagnosis.</li> <li>- No sub-analysis distinguishing PSD (e.g. BD, SCZ, or SAD) patients from other psychiatric patients or subjects</li> <li>- Inclusion of non-adult (&lt;=18years) subjects</li> </ul> |
| Context                                                                     | - Subjects (patients and healthy controls) underwent brain-wide diffusion-weighted MRI imaging (DWI)                                                                              | <ul style="list-style-type: none"> <li>- Only other magnetic resonance techniques (e.g. magnetic resonance spectroscopy, MRS, structural MRI, fMRI techniques..) and no DWI data</li> <li>- No brain-wide diffusion imaging data</li> </ul>                              |
| Population                                                                  | - At least some adult patients and healthy controls                                                                                                                               | <ul style="list-style-type: none"> <li>- No subjects &gt;17 years old</li> <li>- Overlapping population with more recent paper</li> </ul>                                                                                                                                |

| Title                | ID  | Tesla | thing (mm, smactions (0,1, or 1, or 2 see "qua | non-Isotropic ition voxel dimtion (0,1, or 2 :correction (0,1,old for identify | rrrection (0,1, or 2 see "quality" sheet) |   |       |   |   |      |   |  |  |
|----------------------|-----|-------|------------------------------------------------|--------------------------------------------------------------------------------|-------------------------------------------|---|-------|---|---|------|---|--|--|
| White matter mi      | 560 | 3     | 0                                              | 2                                                                              | 2                                         | 2 | 1,8   | 2 | 2 | 0,2  | 2 |  |  |
| Serum S100B pro      | 558 | 3     | 6                                              | 2                                                                              | 2                                         | 2 | 2,5   | 2 | 2 | 0,25 | 2 |  |  |
| Association of ho    | 555 | 3     | 0                                              | 2                                                                              | 2                                         | 2 | 2     | 2 | 2 | 0,2  | 2 |  |  |
| Lower fractional     | 557 | 3     | 0                                              | 0                                                                              | 2                                         | 2 | 1,7   | 2 | 2 | 0,2  | 2 |  |  |
| White matter cha     | 559 | 3     | 0                                              | 1                                                                              | 2                                         | 2 | 1     | 2 | 2 | 0,2  | 2 |  |  |
| Cortical Network     | 556 | 3     | 0                                              | 2                                                                              | 2                                         | 2 | 1,5   | 2 | 2 | 0,2  | 2 |  |  |
| ode, early-onset     | 12  | 1.5   | 8                                              | 0                                                                              | 2                                         | 2 | 2     | 1 | 2 | 0.5  | 2 |  |  |
| tructure in treatr   | 11  | 3     | 0                                              | 2                                                                              | 2                                         | 2 | 2     | 2 | 2 | 0.3  | 2 |  |  |
| nosis and the im     | 58  | 3     | 0                                              | 0                                                                              | 1                                         | 2 | 2,5   | 2 | 2 | 0.2  | 0 |  |  |
| schizophrenia        | 16  | 3     | 0                                              | 2                                                                              | 2                                         | 2 | 1.9   | 2 | 2 | 0.2  | 2 |  |  |
| anisotropy in adu    | 108 | 3     | 0                                              | 0                                                                              | 0                                         | 0 | 3     | 0 | 1 | 0.2  | 2 |  |  |
| white matter disa    | 2   | 1.5   | 8                                              | 2                                                                              | 2                                         | 2 | 1     | 1 | 2 | 0.2  | 2 |  |  |
| tracts in patients   | 18  | 3     | 6                                              | 0                                                                              | 2                                         | 2 | 2     | 2 | 2 | 0.2  | 0 |  |  |
| naging study in      | 8   | 3     | 2                                              | 0                                                                              | 2                                         | 2 | 1,8   | 1 | 2 | 0.2  | 2 |  |  |
| corticopontine-co    | 100 | 1.5   | 0                                              | 0                                                                              | 0                                         | 0 | 3     | 0 | 2 | 0,4  | 2 |  |  |
| of white matter a    | 70  | 1.5   | 6                                              | 0                                                                              | 2                                         | 2 | 1     | 0 | 0 | 0,4  | 0 |  |  |
| and white matte      | 52  | 3     | 0                                              | 1                                                                              | 2                                         | 2 | 2     | 0 | 2 | 0,3  | 2 |  |  |
| hizophrenia are glob | 311 | 1.5   | 8                                              | 0                                                                              | 2                                         | 2 | 2,5   | 2 | 2 | 0,3  | 2 |  |  |
| hizophrenia: effects | 333 | 1.5   | 8                                              | 2                                                                              | 2                                         | 2 | 2,5   | 0 | 2 | 0,3  | 2 |  |  |
| ntation dispersi     | 293 | 3     | 4                                              | 1                                                                              | 2                                         | 2 | 2,5   | 0 | 2 | 0,3  | 2 |  |  |
| nsions of schizo     | 317 | 3     | 0                                              | 1                                                                              | 1                                         | 0 | 2,5   | 1 | 2 | 0,3  | 2 |  |  |
| hallucinating and    | 328 | 3     | 0                                              | 1                                                                              | 1                                         | 0 | 2,4   | 1 | 2 | 0,3  | 2 |  |  |
| ormalities in ado    | 92  | 3     | 4                                              | 2                                                                              | 2                                         | 2 | 2     | 0 | 1 | 0,25 | 0 |  |  |
| the impact of an     | 114 | 3     | 0                                              | 2                                                                              | 2                                         | 2 | 2,5   | 2 | 2 | 0,25 | 2 |  |  |
| estigated using v    | 47  | 1.5   | 0                                              | 0                                                                              | 2                                         | 2 | 1,75  | 0 | 2 | 0,2  | 2 |  |  |
| itiate patients wi   | 46  | 1.5   | 0                                              | 0                                                                              | 2                                         | 2 | 1,75  | 0 | 2 | 0,2  | 2 |  |  |
| ipolar disorder      | 95  | 3     | 0                                              | 1                                                                              | 2                                         | 2 | 2,5   | 0 | 1 | 0,2  | 2 |  |  |
| alterations betwe    | 90  | 3     | 0                                              | 2                                                                              | 2                                         | 0 | 1,75  | 2 | 2 | 0,2  | 2 |  |  |
| function in chror    | 106 | 3     | 0                                              | 2                                                                              | 2                                         | 0 | 3,5   | 1 | 2 | 0,2  | 2 |  |  |
| episodic memory      | 325 | 3     | 8                                              | 2                                                                              | 1                                         | 2 | 2     | 1 | 2 | 0,2  | 2 |  |  |
| v. major depres      | 236 | 3     | 8                                              | 0                                                                              | 1                                         | 2 | 2,5   | 1 | 1 | 0,2  | 2 |  |  |
| r integrity in the   | 255 | 1.5   | 8                                              | 0                                                                              | 1                                         | 0 | 4     | 0 | 1 | 0,2  | 0 |  |  |
| try and white ma     | 75  | 3     | 8                                              | 1                                                                              | 2                                         | 0 | 3     | 0 | 2 | 0,2  | 2 |  |  |
| ormalities in s      | 77  | 3     | 8                                              | 2                                                                              | 0                                         | 0 | 1,75  | 0 | 2 | 0,2  | 2 |  |  |
| izophrenia: a cr     | 111 | 3     | 8                                              | 2                                                                              | 2                                         | 0 | 3     | 0 | 2 | 0,2  | 2 |  |  |
| -naive patients v    | 341 | 3     | 6                                              | 0                                                                              | 1                                         | 2 | 2     | 1 | 0 | 0,2  | 2 |  |  |
| ipolar disorder ar   | 331 | 3     | 0                                              | 2                                                                              | 1                                         | 2 | 0     | 2 | 2 | 0,2  | 2 |  |  |
| ties in first-episo  | 253 | 1.5   | 0                                              | 0                                                                              | 2                                         | 2 | 1     | 1 | 1 | 0,2  | 2 |  |  |
| ith schizophrenia    | 130 | 3     | 0                                              | 1                                                                              | 2                                         | 0 | 1,88  | 1 | 2 | 0,2  | 2 |  |  |
| white matter cor     | 254 | 3     | 0                                              | 0                                                                              | 1                                         | 2 | 3     | 1 | 2 | 0,2  | 2 |  |  |
| in schizophrenia     | 262 | 3     | 0                                              | 1                                                                              | 1                                         | 2 | 2     | 1 | 2 | 0,2  | 2 |  |  |
| with altered whit    | 211 | 3     | 0                                              | 1                                                                              | 2                                         | 2 | 2     | 0 | 2 | 0,2  | 2 |  |  |
| comparative stuc     | 339 | 3     | 0                                              | 0                                                                              | 2                                         | 2 | 2     | 0 | 2 | 0,2  | 2 |  |  |
| ients with drug-r    | 245 | 3     | 0                                              | 1                                                                              | 1                                         | 0 | 1,9   | 2 | 2 | 0,2  | 2 |  |  |
| es white matter      | 223 | 3     | 0                                              | 1                                                                              | 2                                         | 0 | 1,875 | 2 | 2 | 0,2  | 2 |  |  |

| Title               | ID  | Tesla | thing (mm, smactions (0,1, or 1, or 2 see "qua | non-Isotropic ition voxel dimtion (0,1, or 2 :correction (0,1,old for identify | rrrection (0,1, or 2 see "quality" sheet) |   |        |   |   |      |   |  |  |
|---------------------|-----|-------|------------------------------------------------|--------------------------------------------------------------------------------|-------------------------------------------|---|--------|---|---|------|---|--|--|
| in youth with an    | 335 | 3     | 0                                              | 1                                                                              | 1                                         | 0 | 2,5    | 1 | 2 | 0,2  | 2 |  |  |
| 0 relate to white   | 163 | 3     | 0                                              | 2                                                                              | 1                                         | 0 | 1,8    | 1 | 2 | 0,2  | 2 |  |  |
| severe treatmen     | 329 | 3     | 0                                              | 1                                                                              | 1                                         | 0 | 1      | 1 | 2 | 0,2  | 2 |  |  |
| ite-onset schizop   | 324 | 1.5   | 8                                              | 0                                                                              | 1                                         | 2 | 2      | 0 | 0 | 0,18 | 2 |  |  |
| ymptoms in schi     | 241 | 1.5   | 6                                              | 0                                                                              | 2                                         | 2 | 2      | 1 | 1 | 0,18 | 2 |  |  |
| sis and their rela  | 307 | 3     | 10                                             | 1                                                                              | 0                                         | 2 | 2      | 0 | 0 | 0,15 | 2 |  |  |
| nia as revealed     | 182 | 1.5   | 4                                              | 0                                                                              | 1                                         | 0 | 1,13   | 2 | 2 | 0,14 | 2 |  |  |
| white matter mi     | 67  | 3     | 0                                              | 1                                                                              | 2                                         | 2 | 2      | 0 | 0 | 0    | 0 |  |  |
| patients with clo   | 4   | 3     | 0                                              | 1                                                                              | 2                                         | 2 | 1      | 1 | 2 | 0    | 2 |  |  |
| compulsive disc     | 21  | 1.5   | 0                                              | 0                                                                              | 2                                         | 2 | 1      | 1 | 2 | 0    | 2 |  |  |
| patients with sc    | 105 | 1.5   | 0                                              | 2                                                                              | 2                                         | 0 | 3      | 1 | 2 | 0    | 2 |  |  |
| nia: a diffusion t  | 25  | 3     | 0                                              | 2                                                                              | 2                                         | 0 | 2      | 1 | 2 | 0    | 2 |  |  |
| egrity related to r | 29  | 3     | 0                                              | 1                                                                              | 2                                         | 2 | 2      | 0 | 0 | 0    | 2 |  |  |
| ecting structural c | 50  | 1.5   | 8                                              | 0                                                                              | 2                                         | 0 | 4      | 0 | 0 | 0    | 0 |  |  |
| ssible intermedia   | 84  | 3     | 8                                              | 1                                                                              | 2                                         | 0 | 2      | 1 | 1 | 0    | 2 |  |  |
| ymptoms of sch      | 45  | 3     | 7                                              | 0                                                                              | 2                                         | 2 | 1      | 1 | 2 | 0    | 2 |  |  |
| es in paranoid se   | 51  | 3     | 6                                              | 0                                                                              | 2                                         | 2 | 1      | 0 | 0 | 0    | 0 |  |  |
| and genetic high    | 40  | 3     | 6                                              | 0                                                                              | 2                                         | 2 | 2      | 0 | 0 | 0    | 2 |  |  |
| egrity in adolesce  | 23  | 3     | 6                                              | 0                                                                              | 2                                         | 0 | 1      | 1 | 2 | 0    | 0 |  |  |
| normalities betw    | 89  | 1.5   | 6                                              | 0                                                                              | 1                                         | 0 | 2,03   | 0 | 1 | 0    | 0 |  |  |
| ysconnectivity in   | 5   | 1.5   | 6                                              | 0                                                                              | 2                                         | 0 | 5      | 0 | 1 | 0    | 2 |  |  |
| ly of white matte   | 6   | 1.5   | 4                                              | 2                                                                              | 2                                         | 0 | 1,875  | 0 | 1 | 0    | 2 |  |  |
| hizophrenia on v    | 104 | 1.5   | 4                                              | 2                                                                              | 2                                         | 0 | 2,5    | 0 | 2 | 0    | 2 |  |  |
| osis in young ad    | 180 | 1.5   | 3                                              | 0                                                                              | 1                                         | 2 | 1,95   | 0 | 2 | 0    | 2 |  |  |
| ces and structur    | 176 | 3     | 3                                              | 0                                                                              | 2                                         | 0 | 1,8    | 0 | 0 | 0    | 2 |  |  |
| ry and white ma     | 76  | 3     | 2                                              | 0                                                                              | 2                                         | 0 | 1,8    | 0 | 0 | 0    | 2 |  |  |
| r structure and i   | 60  | 3     | 10                                             | 0                                                                              | 2                                         | 0 | 2,2    | 0 | 0 | 0    | 2 |  |  |
| ic bipolar patien   | 194 | 1.5   | 8                                              | 0                                                                              | 0                                         | 0 | 0,9375 | 1 | 2 | 0    | 2 |  |  |
| l disorder: a voxel | 302 | 1.5   | 8                                              | 0                                                                              | 0                                         | 0 | 5      | 0 | 1 | 0    | 2 |  |  |
| white matter inte   | 39  | 3     | 6                                              | 0                                                                              | 2                                         | 2 | 2      | 0 | 0 | 0    | 2 |  |  |
| ed to performan     | 134 | 3     | 6                                              | 0                                                                              | 2                                         | 2 | 2      | 2 | 2 | 0    | 2 |  |  |
| nd first-episode s  | 319 | 3     | 6                                              | 0                                                                              | 0                                         | 2 | 1      | 1 | 2 | 0    | 2 |  |  |
| imaging (dti) ana   | 146 | 3     | 6                                              | 0                                                                              | 2                                         | 0 | 1,02   | 0 | 0 | 0    | 2 |  |  |
| r in schizophren    | 169 | 1.5   | 6                                              | 0                                                                              | 0                                         | 0 | 5      | 0 | 0 | 0    | 2 |  |  |
| nd diffusion tense  | 280 | 1.5   | 2                                              | 0                                                                              | 1                                         | 0 | 1,13   | 2 | 2 | 0    | 2 |  |  |
| schizophrenic p     | 181 | 3     | 12                                             | 0                                                                              | 0                                         | 0 | 0      | 0 | 0 | 0    | 0 |  |  |
| zophrenia detect    | 301 | 1.5   | 12                                             | 1                                                                              | 1                                         | 0 | 2,8    | 1 | 2 | 0    | 2 |  |  |
| connectivity and    | 266 | 1.5   | 10                                             | 0                                                                              | 0                                         | 0 | 2      | 2 | 2 | 0    | 0 |  |  |
| d to psychosis-s    | 120 | 3     | 0                                              | 1                                                                              | 2                                         | 2 | 1,3    | 2 | 2 | 0    | 2 |  |  |
| al thickness in p   | 56  | 1.5   | 0                                              | 0                                                                              | 1                                         | 2 | 2      | 0 | 2 | 0    | 2 |  |  |
| r disorder: a trac  | 44  | 3     | 0                                              | 1                                                                              | 2                                         | 0 | 2,5    | 2 | 2 | 0    | 2 |  |  |
| natter abnormali    | 199 | 1.5   | 0                                              | 2                                                                              | 2                                         | 0 | 1,875  | 2 | 2 | 0    | 2 |  |  |
| r integrity in adc  | 179 | 1.5   | 6                                              | 1                                                                              | 1                                         | 0 | 1      | 0 | 1 | 0    | 2 |  |  |
| al white matter c   | 272 | 3     | 4                                              | 0                                                                              | 0                                         | 0 | 1,6    | 0 | 0 | 0    | 0 |  |  |
| text of abnormal    | 351 | 3     | 4                                              | 2                                                                              | 2                                         | 0 | 2      | 2 | 2 | 0    | 2 |  |  |

| Title               | ID  | Tesla | thing (mm, smactions (0,1, or 1, or 2 see "qua non-Isotropic ition voxel dimption (0,1, or 2 :correction (0,1old for identifyrrrection (0,1, or 2 see "quality" sheet) |   |   |   |      |   |   |   |   |  |  |
|---------------------|-----|-------|------------------------------------------------------------------------------------------------------------------------------------------------------------------------|---|---|---|------|---|---|---|---|--|--|
| ymia: a multicon    | 275 | 1.5   | 2                                                                                                                                                                      | 1 | 2 | 0 | 2,2  | 0 | 1 | 0 | 0 |  |  |
| uage, and child     | 322 | 1.5   | 0                                                                                                                                                                      | 0 | 1 | 2 | 3    | 1 | 2 | 0 | 2 |  |  |
| tment diffusion n   | 342 | 3     | 0                                                                                                                                                                      | 2 | 2 | 2 | 2,05 | 1 | 2 | 0 | 2 |  |  |
| bipolar i and bipo  | 326 | 3     | 0                                                                                                                                                                      | 0 | 1 | 2 | 1,8  | 1 | 2 | 0 | 2 |  |  |
| disorder, bipolar   | 327 | 3     | 0                                                                                                                                                                      | 2 | 1 | 2 | 1    | 1 | 2 | 0 | 2 |  |  |
| a radiata: in relat | 291 | 3     | 0                                                                                                                                                                      | 2 | 1 | 2 | 2    | 0 | 2 | 0 | 2 |  |  |

|               | CRITERIA                                            | 2=Best                                                | 1=Intermediate                                  | 0=Worst                        |
|---------------|-----------------------------------------------------|-------------------------------------------------------|-------------------------------------------------|--------------------------------|
| Acquisition   | Number of unique directions                         | > =60                                                 | 30-59                                           | <30 /missing data              |
|               | B-value                                             | >=1000                                                | 700-1000                                        | <700/missing data              |
|               | Voxel size                                          | Isotropic voxel                                       |                                                 | Non-isotropic voxel            |
| Preprocessing | Exclusion due to motion                             | Motion check with exclusion criteria                  | Mentioned motion correction with unclear effect | No motion / data quality check |
|               |                                                     | motion as covariate in regression, exclusion criteria |                                                 | (No mention of motion)         |
|               | Eddy current correction and motion correction       | Present                                               |                                                 | Missing                        |
| Analysis      | Correcting for multiple comparisons (if applicable) | Yes                                                   | Some steps only                                 | Not at all                     |
|               |                                                     |                                                       |                                                 |                                |

| Author (Name and Email)                                       | Affiliation(s)                                                                                                                                                                                       | CRedit Roles                                                                                                         |
|---------------------------------------------------------------|------------------------------------------------------------------------------------------------------------------------------------------------------------------------------------------------------|----------------------------------------------------------------------------------------------------------------------|
| Giuseppe Pierpaolo Merola (giuseppelierpaolo.merola@unifi.it) | Psychiatry Unit, Department of Health Sciences, University of Florence, Florence, Italy                                                                                                              | Conceptualization, Methodology, Formal analysis, Investigation, Writing – Original Draft, Writing – Review & Editing |
| Livio Tarchi (livio.tarchi@unifi.it)                          | Psychiatry Unit, Department of Health Sciences, University of Florence, Florence, Italy                                                                                                              | Conceptualization, Methodology, Formal analysis, Validation, Writing – Original Draft, Writing – Review & Editing    |
| Luigi F Saccaro (luigifrancesco.saccaro@unige.ch)             | Psychiatry Department, Geneva University Hospital and Faculty of Medicine, Geneva University Hospital, Switzerland                                                                                   | Conceptualization, Methodology, Investigation, Writing – Original Draft, Writing – Review & Editing                  |
| Farnaz Delavari (farnaz.delavari@epfl.ch)                     | Neuro-X Institute, École Polytechnique Fédérale de Lausanne, Geneva, Switzerland; Developmental Imaging and Psychopathology Laboratory, University of Geneva School of Medicine, Geneva, Switzerland | Writing – Review & Editing                                                                                           |
| Camille Piguet (camille.piguet@unige.ch)                      | Psychiatry Department, Geneva University Hospital and Faculty of Medicine, Geneva University Hospital, Switzerland; General Pediatric Division, Geneva University Hospital, Switzerland              | Supervision, Writing – Review & Editing                                                                              |
| Dimitri Van De Ville (dimitri.vandeville@epfl.ch)             | Neuro-X Institute, École Polytechnique Fédérale de Lausanne, Geneva, Switzerland; Department of Radiology and Medical Informatics, University of Geneva, Geneva, Switzerland                         | Supervision, Writing – Review & Editing                                                                              |
| Giovanni Castellini (giovanni.castellini@unifi.it)            | Psychiatry Unit, Department of Health Sciences, University of Florence, Florence, Italy                                                                                                              | Supervision, Writing – Review & Editing                                                                              |
| Valdo Ricca (valdo.ricca@unifi.it)                            | Psychiatry Unit, Department of Health Sciences, University of Florence, Florence, Italy                                                                                                              | Supervision, Writing – Review & Editing                                                                              |
